# Supplementary material
Source: PubMed Central journal article supplement (PMC10187983)

Figure 1h Wes results, original image \* WT preDP, \*\* DNS DN3, \*\*\* DNS preDP, \*\*\*\* N1c preDP

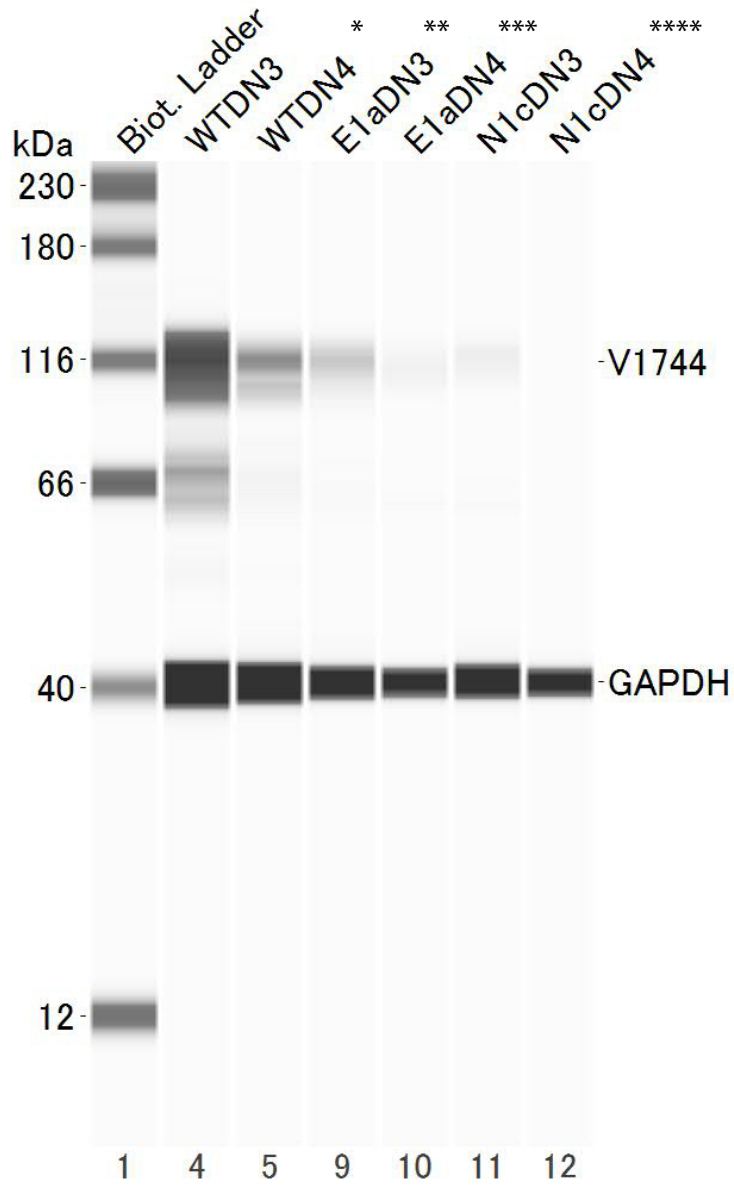

Supplement: NIHMS1893704-supplement-Fig1h_original_image.pdf [file NIHMS1893704-supplement-Fig1h_original_image.pdf]
